# Supplementary material
Source: JCI journal article supplement (doi:10.1172/jci190531)
Supplement: sd1 [file 1]

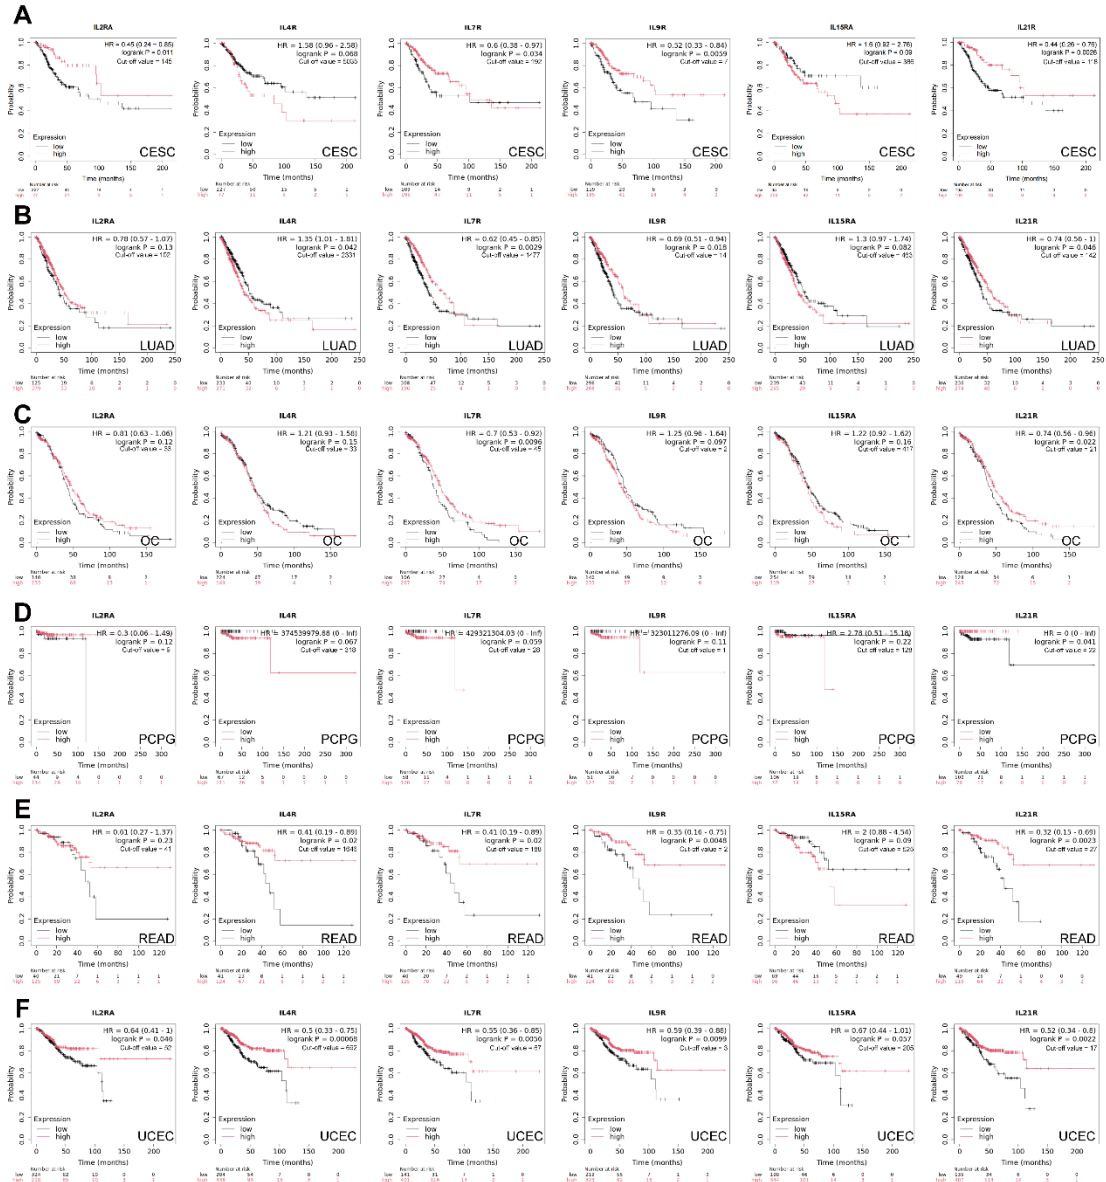

**Figure S1. The expression of IL21 in TME is correlated with favorable prognosis.**

Kaplan–Meier analysis of the overall survival (OS) of CESC (A), LUAD (B), OC (C), PCPG (D), READ (E), and UCEC (F) patients with high or low expression *IL2RA*, *IL4R*, *IL7R*, *IL9R*, *IL15RA* and *IL21R* from KM-plotter database.

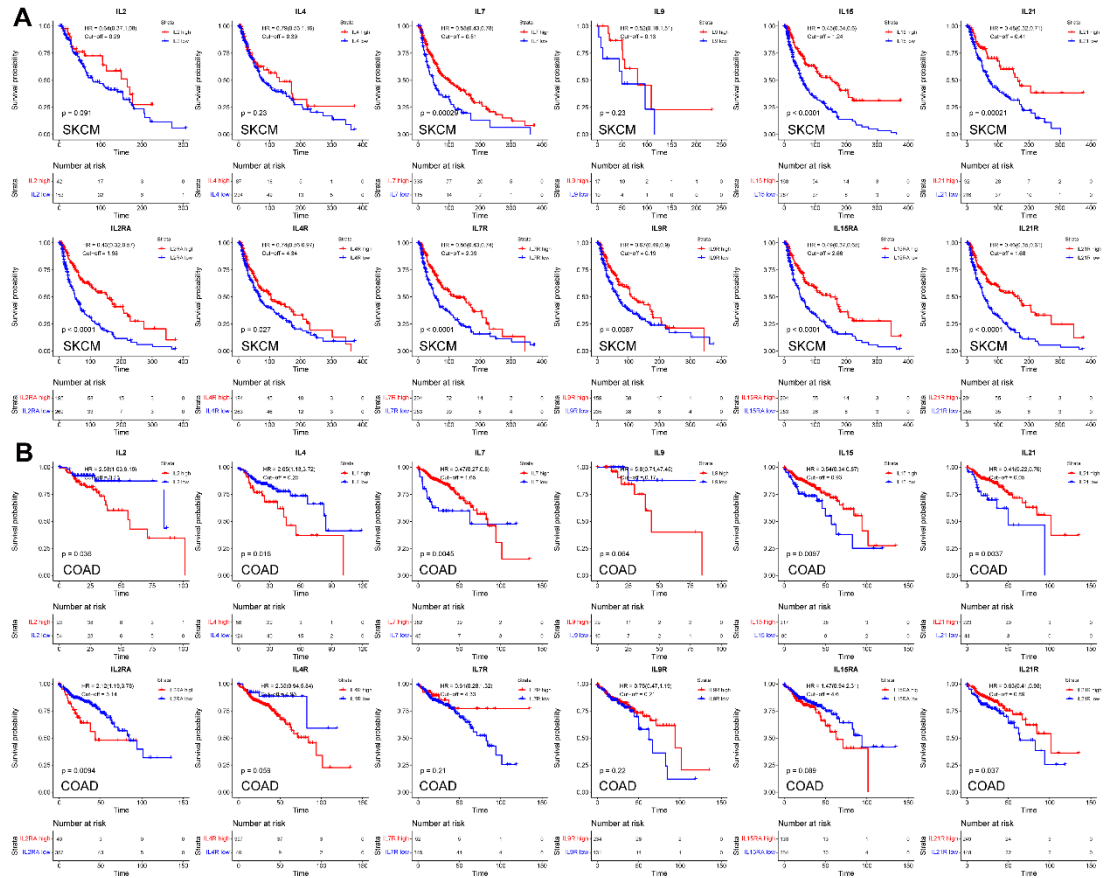

**Figure S2. The expression of IL21 in TME is correlated with favorable radiotherapy prognosis.** (A) Kaplan–Meier analysis of OS of radiotherapy-treated SKCM patients with high or low expression of *IL2*, *IL4*, *IL7*, *IL9*, *IL15*, *IL21* and corresponding receptors (*IL2RA*, *IL4R*, *IL7R*, *IL9R*, *IL15RA* and *IL21R*) from TCGA database. (B) Kaplan–Meier analysis of OS of radiotherapy-treated COAD patients with high or low expression of *IL2*, *IL4*, *IL7*, *IL9*, *IL15*, *IL21* and corresponding receptors (*IL2RA*, *IL4R*, *IL7R*, *IL9R*, *IL15RA* and *IL21R*) from TCGA database.

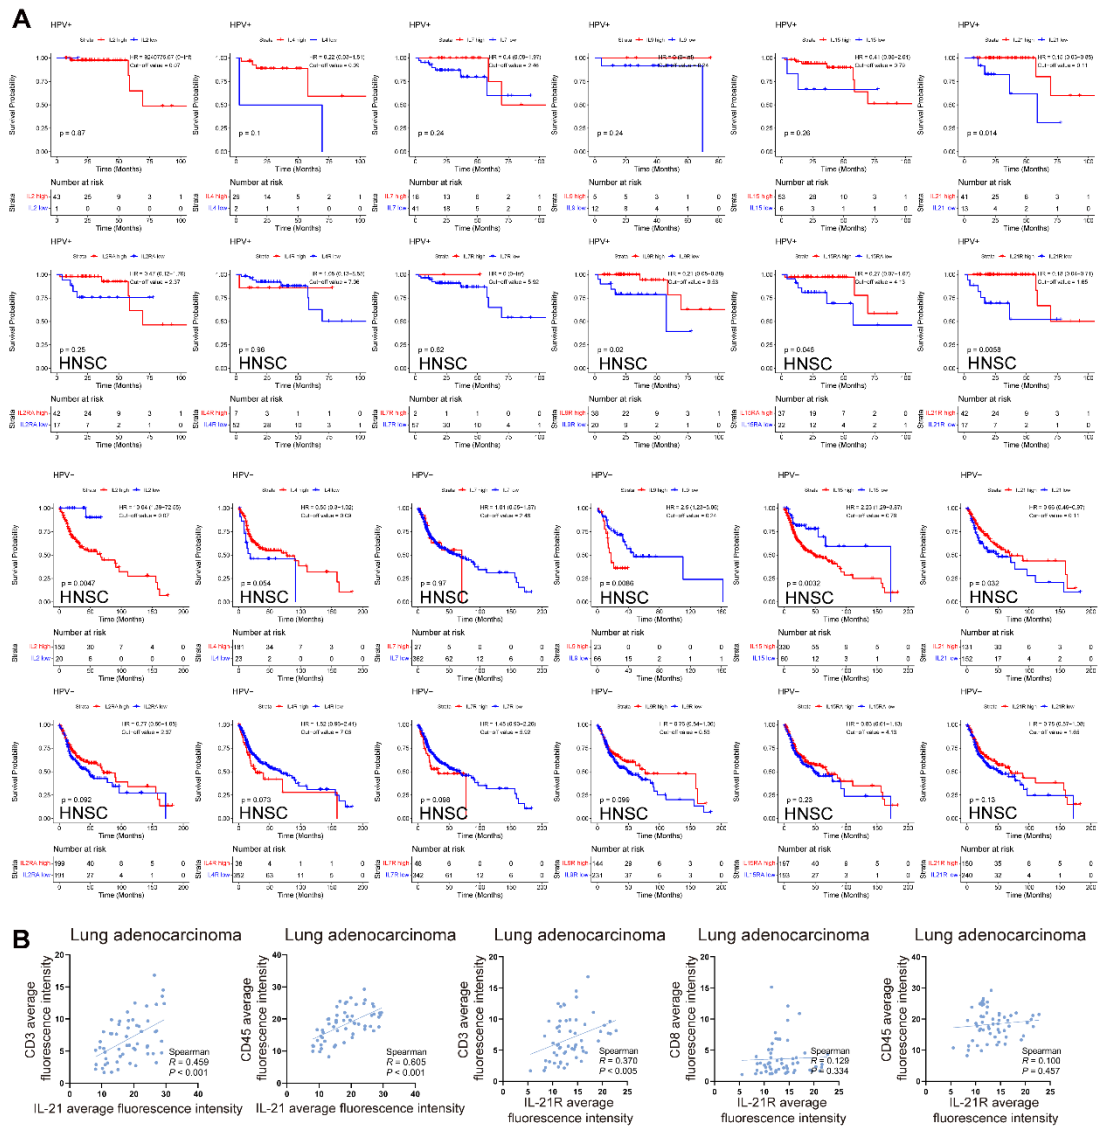

**Figure S3. The expression of IL21 in TME is correlated with favorable radiotherapy prognosis of HNSC patients and increased CD8<sup>+</sup> T cell infiltration.**

(A) Kaplan–Meier analysis of OS of radiotherapy-treated HPV<sup>+</sup> and HPV<sup>-</sup> HNSC patients with high or low expression of *IL2*, *IL4*, *IL7*, *IL9*, *IL15*, *IL21* and corresponding receptors (*IL2RA*, *IL4R*, *IL7R*, *IL9R*, *IL15RA* and *IL21R*) from TCGA database. (B) Correlation analysis of expression of IL-21/IL-21R and CD3/CD8/CD45 in lung adenocarcinoma samples.

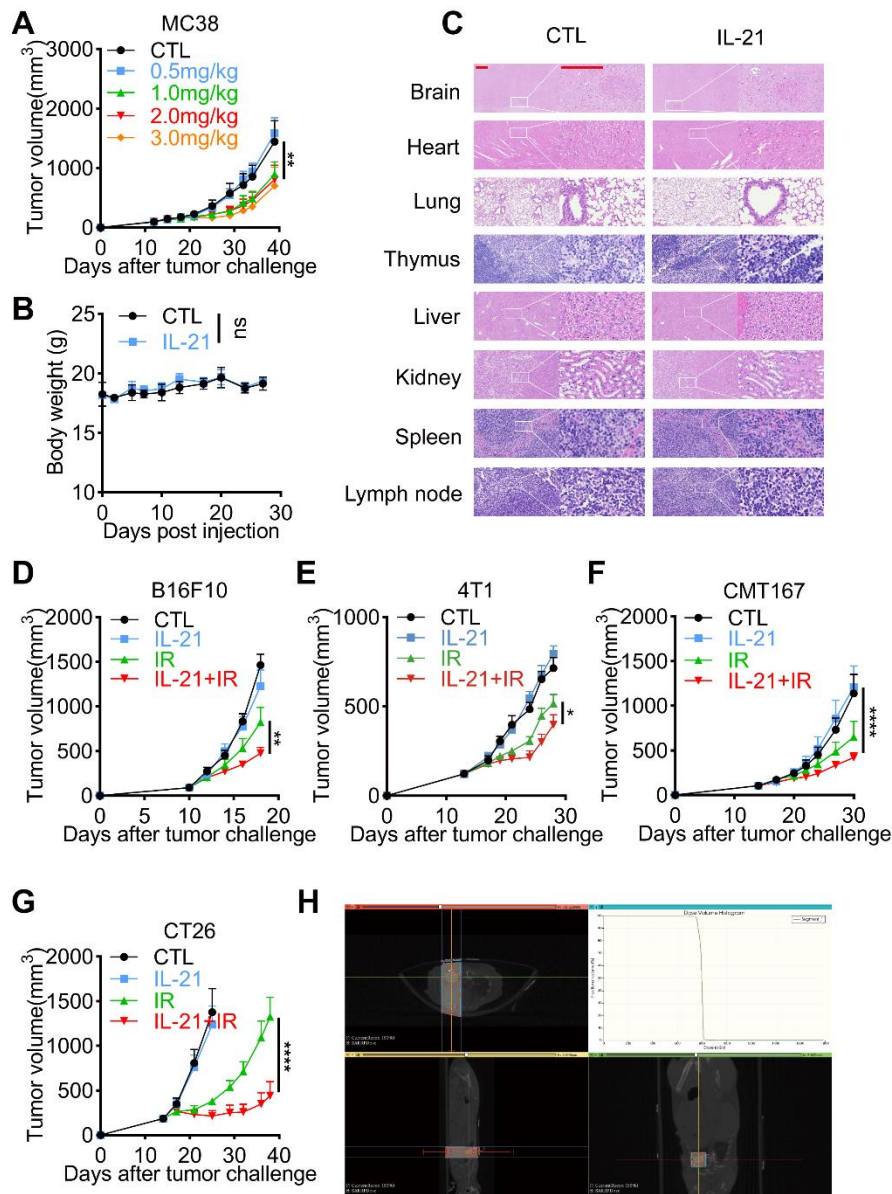

**Figure S4. Exogenous IL-21 administration synergistically enhances radiation efficacy with demonstrated safety.** (A) Tumor growth of MC38 tumors in C57BL/6J mice subjected to intraperitoneal administration of IR of IL-21 (0.5 mg/kg, 1.0 mg/kg, 2.0 mg/kg, 3.0 mg/kg) (n =7 per group). (B) Body weight of C57BL/6J mice with intraperitoneal administration of PBS or IL-21 (1.0 mg/kg) (n =3 per group). (C) Representative data of HE staining of brain, heart, lung, thymus, liver, kidney, spleen and lymph node of C57BL/6J mice treated with or without IL-21 (1.0 mg/kg). (D-G)

Tumor growth of B16F10, 4T1, CMT167 and CT26 tumors in C57BL/6J and Balb/c mice treated with radiation with or without IL-21 (n =6 per group). (H) Precise radiation target area and dose volume histogram for lung orthotopic tumors. Data are shown as mean  $\pm$  SEM. Statistical analysis was performed using two-way ANOVA followed by Dunnett's multiple comparison test (A), two-way ANOVA with Sidak's multiple comparison test (B, G), and two-way ANOVA with Tukey multiple comparison test (D-F). \*p<0.05, \*\*p<0.01, \*\*\*\*p<0.0001.

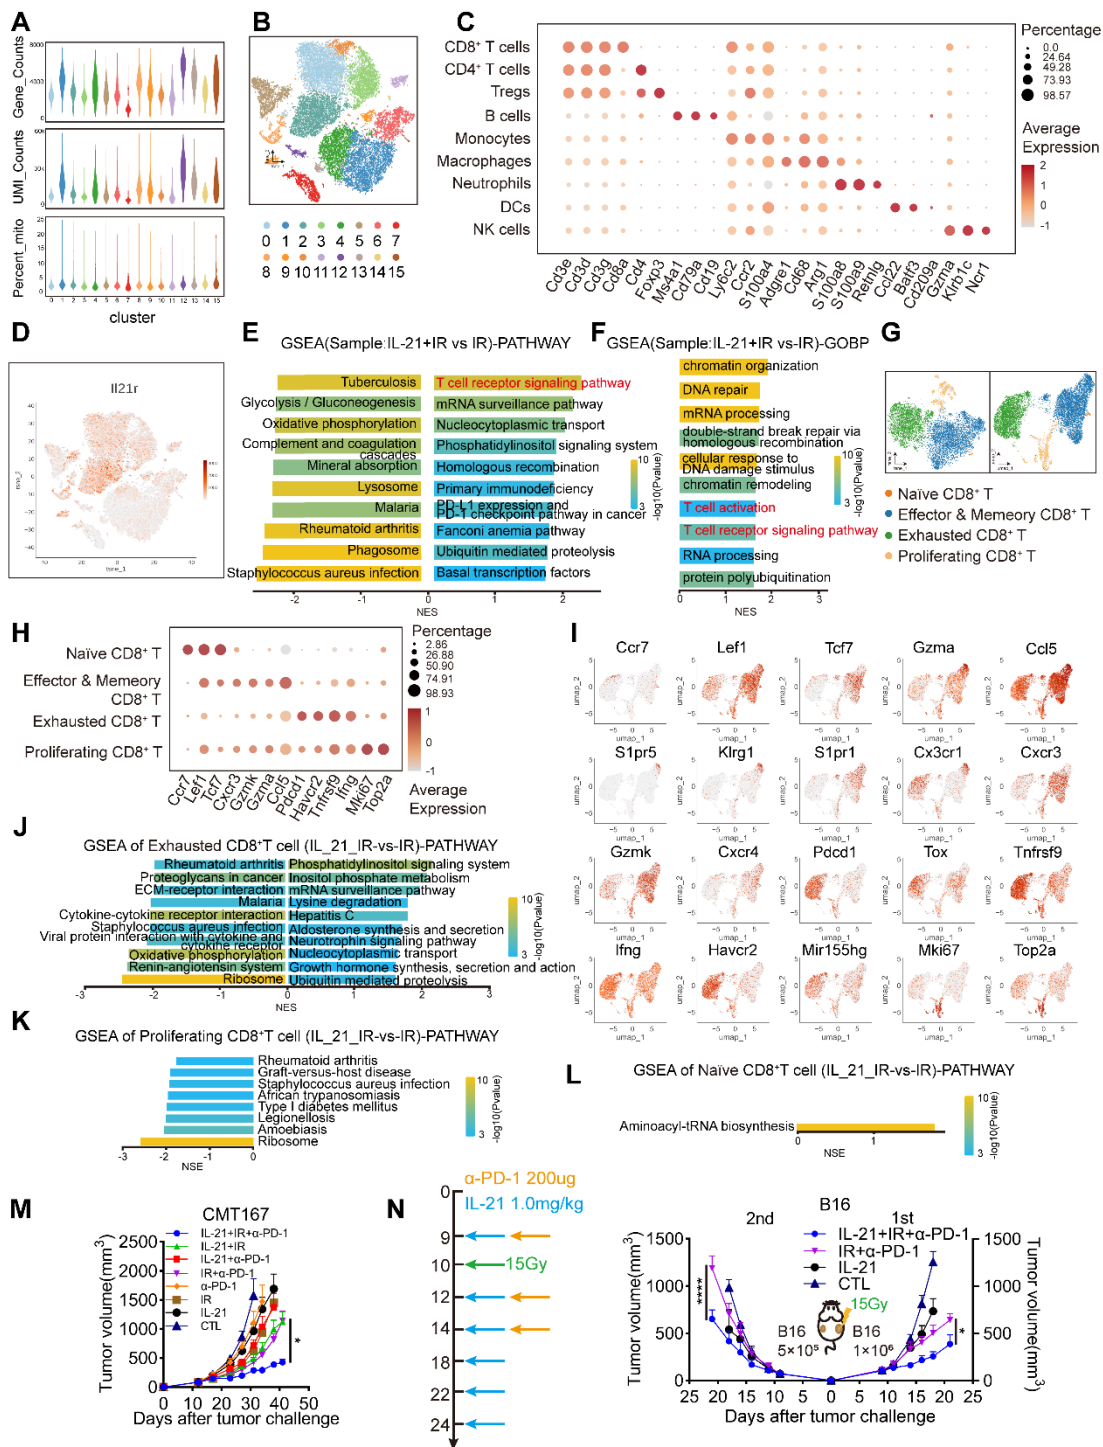

**Figure S5. IL-21 combined with radiation reshapes the TME and increases the infiltration of CD8<sup>+</sup> T cells.** (A) Violin plots demonstrating the data quality control of scRNA-seq. Maximum percentage mito=20%, maximum number of UMIs=60,000, minimum number of nGene=300, and maximum number of nGene=7,500. (B) UMAP

plot showing sorted CD45<sup>+</sup> immune cells. (C) Bubble Chart illustrating the expression levels of the marker genes in each subset of CD45<sup>+</sup> immune cell. (D) t-SNE plot showing the expression levels of *Il21r* in different subtypes of CD45<sup>+</sup> immune cells. (E-F) GSEA analysis of upregulated and downregulated genes for CD45<sup>+</sup> immune cell in IL-21+IR group vs IR group. (G) t-SNE and UMAP plots showing sorted CD8<sup>+</sup> T cells. (H) Bubble Chart showing the expression levels of the marker genes in each subset of CD8<sup>+</sup> T cells. (I) UMAP plots showing the expression levels of the marker genes in different subsets of CD8<sup>+</sup> T cells. (J-L) GSEA analysis of upregulated and downregulated genes for Exhausted (J), Proliferating (K) and Naïve (L) CD8<sup>+</sup> T cells in IL-21+IR group vs IR group. (M) Tumor growth of CMT167 tumors treated with radiation and/or IL-21 with or without anti-PD-1. (N) Tumor growth of B16 tumors treated with radiation combined with anti-PD-1 with or without IL-21. Panel M and N (n = 5-7 per group) are demonstrated as mean ± SEM. Statistical analysis was carried out using two-way ANOVA with Tukey's multiple comparisons test (M) and two-way ANOVA with Sidak's multiple comparisons test (N). \*p<0.05, \*\*\*\*p<0.0001.

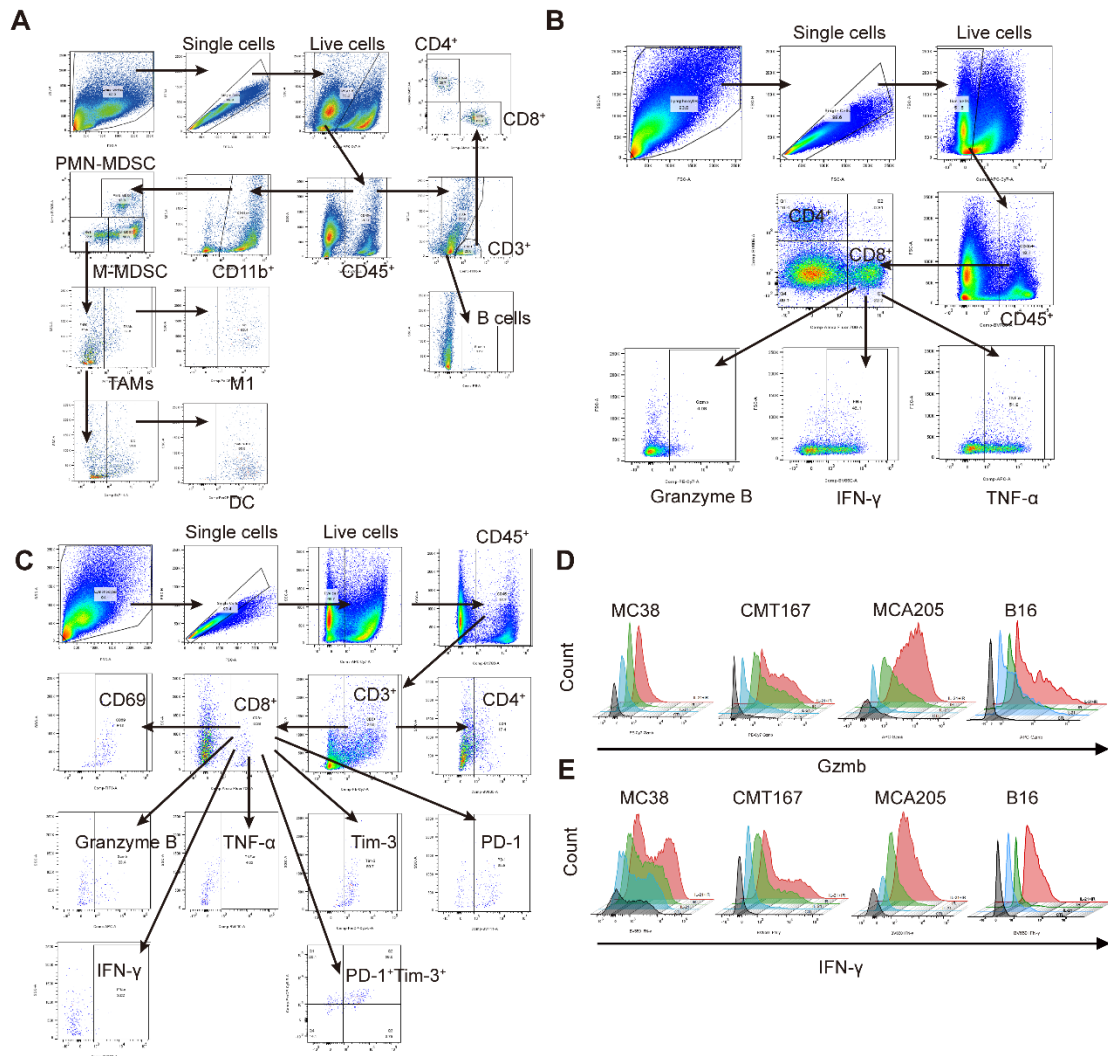

**Figure S6. Gating strategies of flow cytometry analysis and flow cytometry histograms of Gzmb and IFN- $\gamma$  expression in CD8<sup>+</sup> T cells.** (A) Gating strategy of flow cytometry analysis for CD45<sup>+</sup> immune cells in TME. (B) Gating strategy of flow cytometry analysis for CD8<sup>+</sup> T cells in TME. (C) Gating strategy of flow cytometry analysis for CD8<sup>+</sup> T cells in TME. (D) Expression of Gzmb<sup>+</sup> and IFN- $\gamma$ <sup>+</sup> of CD8<sup>+</sup> T cells from MC38, CMT167, MCA205 and B16 tumors.

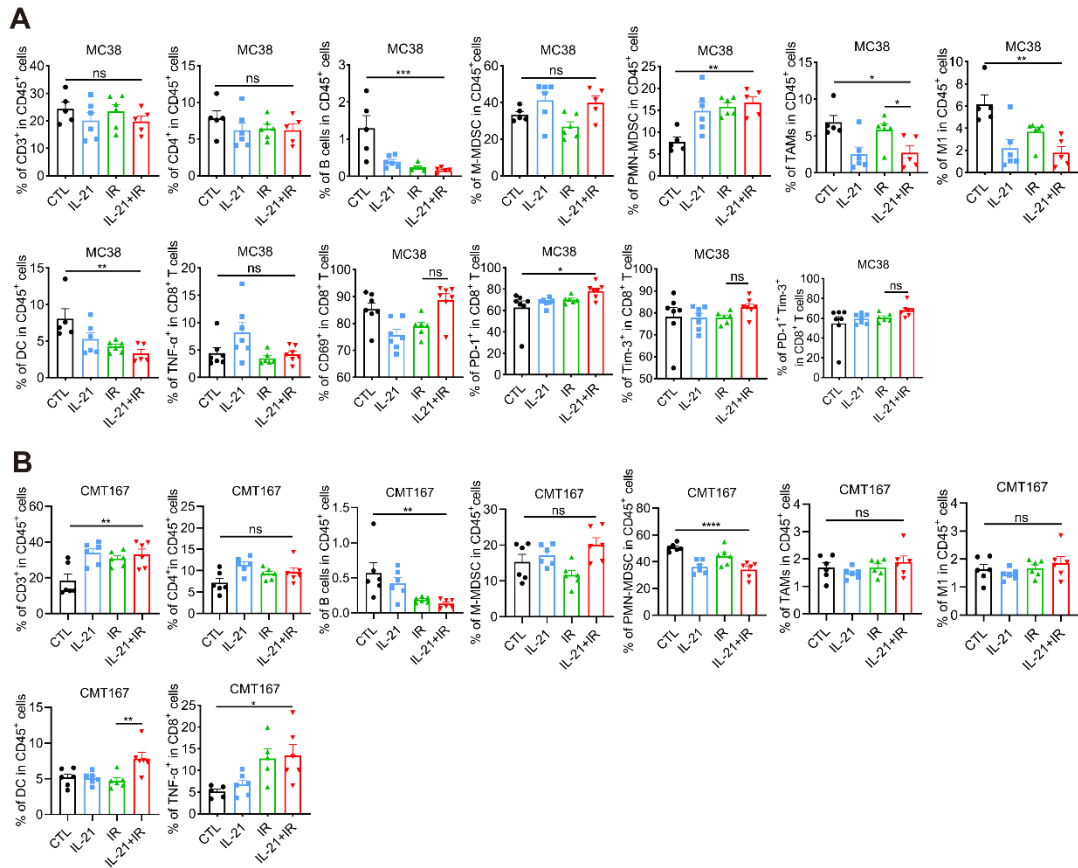

**Figure S7. Flow cytometric analysis of different subsets of immune cells in TME of MC38 and CMT167 tumors. (A)** Quantitative analysis of CD3<sup>+</sup> T cells, CD4<sup>+</sup> T cells, B cells, M-MDSCs, PMN-MDSCs, TAMs, M1-TAMs, DCs, TNF- $\alpha$ <sup>+</sup> CD8<sup>+</sup> T cells, CD69<sup>+</sup> CD8<sup>+</sup> T cells, PD-1<sup>+</sup> CD8<sup>+</sup> T cells, Tim-3<sup>+</sup> CD8<sup>+</sup> T cells and PD-1<sup>+</sup> Tim-3<sup>+</sup> CD8<sup>+</sup> T cells from MC38 tumors subjected to radiation with or without IL-21. **(B)** Quantitative analysis of CD3<sup>+</sup> T cells, CD4<sup>+</sup> T cells, B cells, M-MDSCs, PMN-MDSCs, TAMs, M1-TAMs, DCs and TNF- $\alpha$ <sup>+</sup> CD8<sup>+</sup> T cells from CMT167 tumors subjected to radiation with or without IL-21. Data are shown as mean  $\pm$  SEM (n = 5-7 per group). Statistical analysis was performed using one-way ANOVA followed by Tukey's multiple comparison tests (A-B). ns, p>0.05, \*p<0.05, \*\*p<0.01, \*\*\*p<0.001.

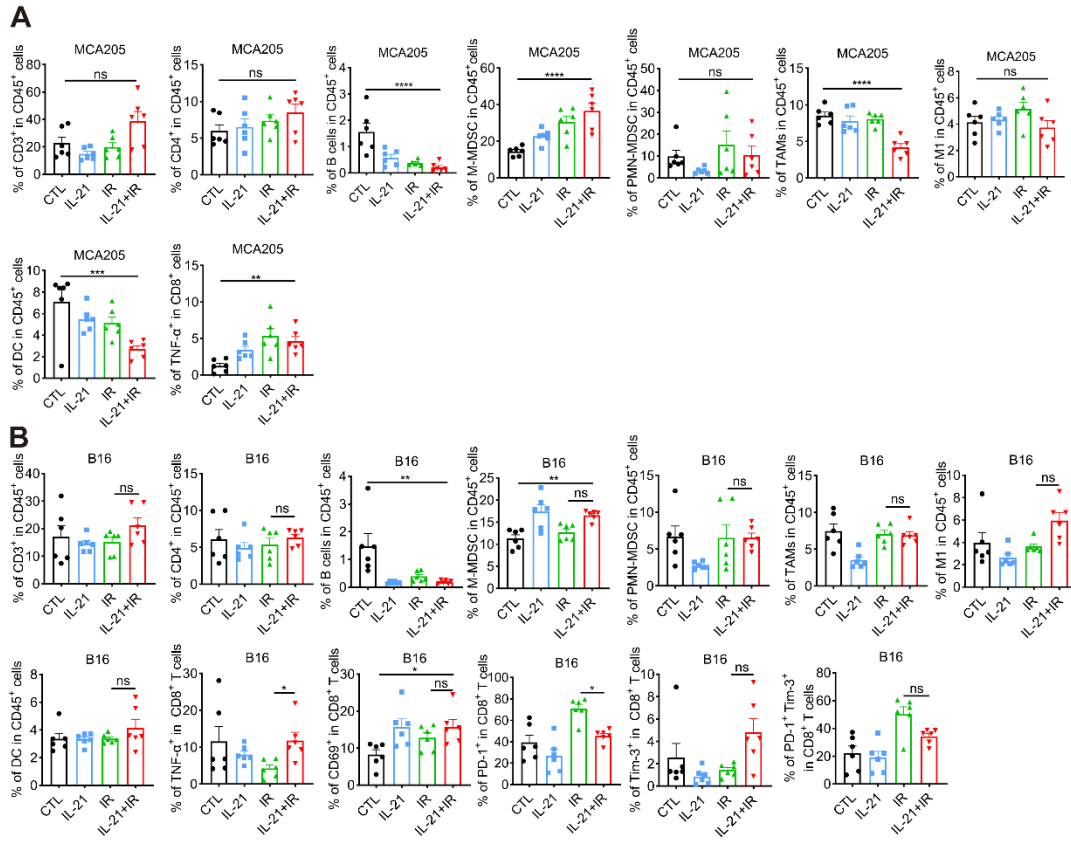

**Figure S8. Flow cytometric analysis of different subsets of immune cells in TME of MCA205 and B16 tumors.** (A) Quantitative analysis of CD3<sup>+</sup> T cells, CD4<sup>+</sup> T cells, B cells, M-MDSCs, PMN-MDSCs, TAMs, M1-TAMs, DCs and TNF- $\alpha$ <sup>+</sup> CD8<sup>+</sup> T cells from MCA205 tumors subjected to radiation with or without IL-21. (B) Quantitative analysis of CD3<sup>+</sup> T cells, CD4<sup>+</sup> T cells, B cells, M-MDSCs, PMN-MDSCs, TAMs, M1-TAMs, DCs, TNF- $\alpha$ <sup>+</sup> CD8<sup>+</sup> T cells, CD69<sup>+</sup> CD8<sup>+</sup> T cells, PD-1<sup>+</sup> CD8<sup>+</sup> T cells, Tim-3<sup>+</sup> CD8<sup>+</sup> T cells and PD-1<sup>+</sup> Tim-3<sup>+</sup> CD8<sup>+</sup> T cells from B16 tumors subjected to radiation with or without IL-21. Data are shown as mean  $\pm$  SEM (n = 5-7 per group). Statistical analysis was performed using one-way ANOVA followed by Tukey's multiple comparison tests (A-B). ns, p>0.05, \*p<0.05, \*\*p<0.01, \*\*\*p<0.001, \*\*\*\*p<0.0001.

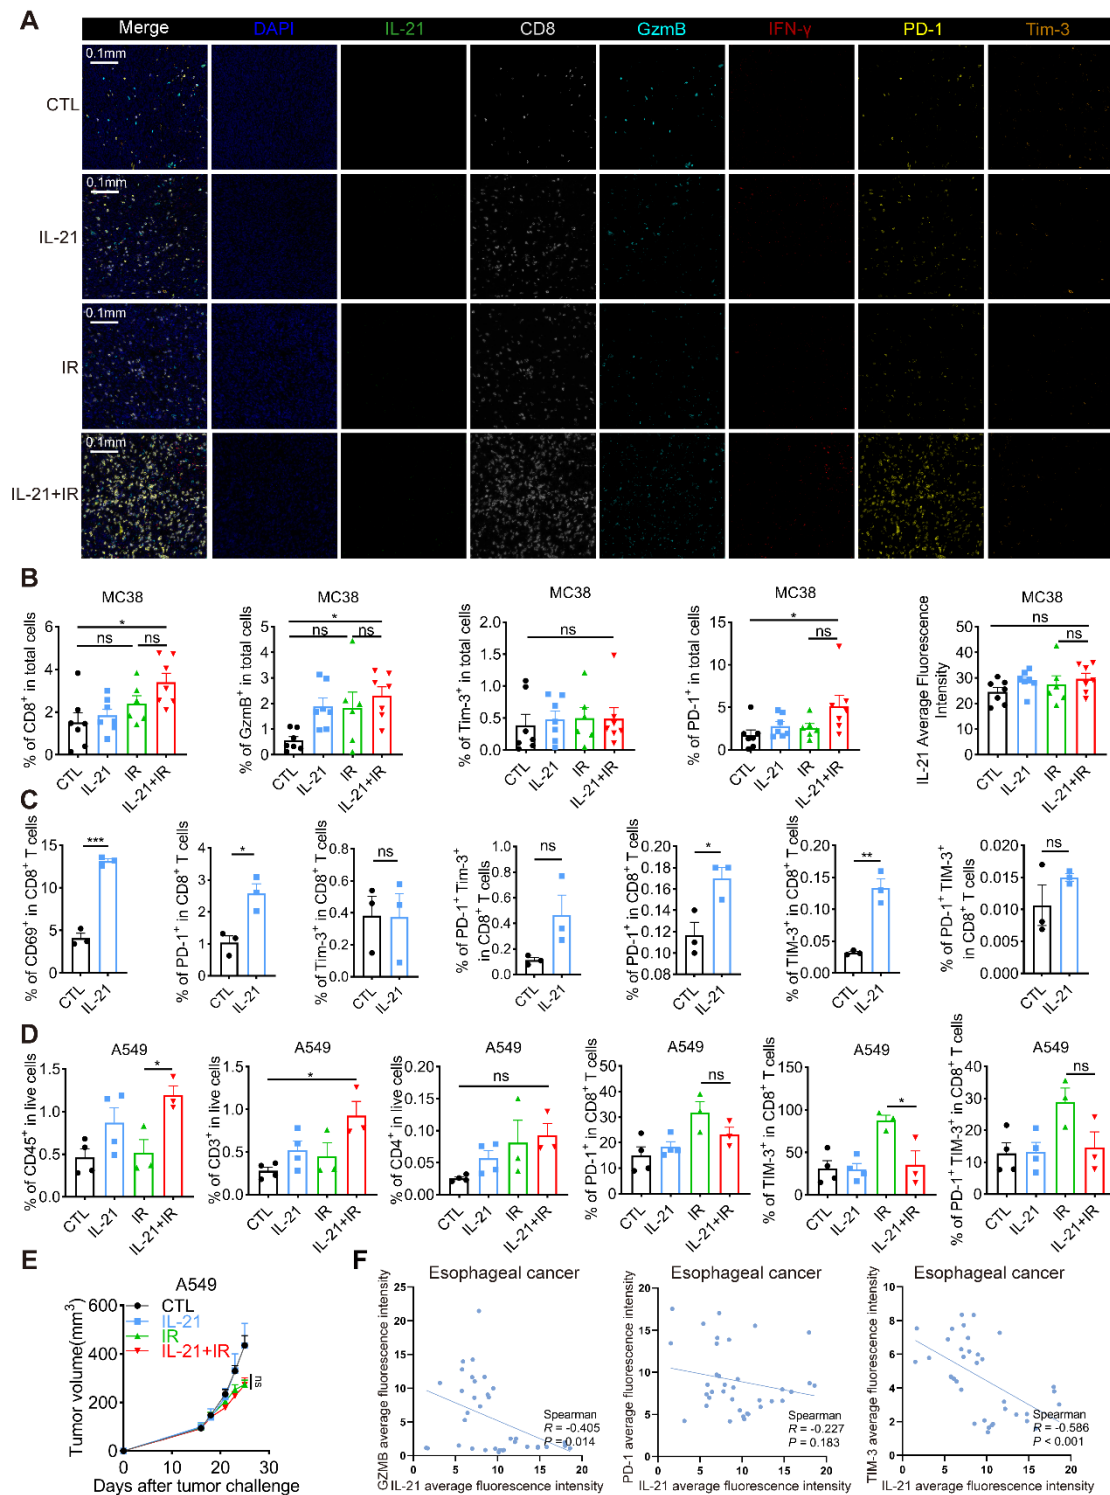

**Figure S9. IL-21 directly boosts the activation and cytotoxicity of CD8<sup>+</sup> T cells.**

(A-B) Representative data and quantitative analysis of IL-21, CD8, GzmB, IFN- $\gamma$ , PD-1 and Tim-3 expression in MC38 tumors subjected to radiation with or without IL-21. (C) Quantitative analysis of CD69<sup>+</sup>, PD-1<sup>+</sup>, Tim-3<sup>+</sup>, PD-1<sup>+</sup> Tim-3<sup>+</sup> murine

CD8<sup>+</sup> T cells (left four panels) and PD-1<sup>+</sup>, TIM-3<sup>+</sup>, PD-1<sup>+</sup> TIM-3<sup>+</sup> human CD8<sup>+</sup> T cells (right three panels) stimulated with anti-CD3 and anti-CD28 in the presence or absence of IL-21. (D) Quantitative analysis of CD45<sup>+</sup> immune cells, CD3<sup>+</sup> T cells, CD4<sup>+</sup> T cells, PD-1<sup>+</sup> CD8<sup>+</sup> T cells, TIM-3<sup>+</sup> CD8<sup>+</sup> T cells and PD-1<sup>+</sup> TIM-3<sup>+</sup> CD8<sup>+</sup> T cells from A549 tumors treated with radiation with or without IL-21 by flow cytometry. (E) Tumor growth of A549 cells in NSG mice subjected to radiation with or without systematic administration of IL-21. (F) Correlation analysis of expression of IL-21 and GZMB, PD-1, TIM-3 in radiotherapy-treated ESCC tissues. Data of Panel B-E are shown as mean  $\pm$  SEM (n = 3-7 per group) Statistical analysis was performed with one-way ANOVA followed by Tukey's multiple comparison test (B, D) and unpaired two-tailed Student's T test (C), and two-way ANOVA with Tukey's multiple comparison test (E). ns, p>0.05, \*p<0.05, \*\*p<0.01, \*\*\*p<0.001.

Table S1. Patient Information of Lung Adenocarcinoma Tissue Microarray.

| Point location | Patient number | Organization Type  | Status       | Survival period (month) | Sex    | Age (year) | Pathological type   | Tumor type      | Pathological grading | Tumor size (cm) |
|----------------|----------------|--------------------|--------------|-------------------------|--------|------------|---------------------|-----------------|----------------------|-----------------|
| A01/A02        | 1              | Cancer/Para-cancer | 1(Death)     | 66                      | Female | 53         | Lung adenocarcinoma | Peripheral type | 2                    | 2×2             |
| A03/A04        | 2              | Cancer/Para-cancer | 0 (Survival) | 95                      | Male   | 49         | Lung adenocarcinoma | -               | 2-3                  | 5×3.5           |
| A05/A06        | 3              | Cancer/Para-cancer | 1(Death)     | 31                      | Male   | 62         | Lung adenocarcinoma | Peripheral type | 2                    | 3.5×2.5         |
| A07/A08        | 4              | Cancer/Para-cancer | 1(Death)     | 2                       | Female | 64         | Lung adenocarcinoma | Peripheral type | 2                    | 3×2.5           |
| B01/B02        | 5              | Cancer/Para-cancer | 0 (Survival) | 89                      | Female | 48         | Lung adenocarcinoma | Peripheral type | 2                    | 2×1.5           |
| B03/B04        | 6              | Cancer/Para-cancer | 0 (Survival) | 90                      | Female | 53         | Lung adenocarcinoma | Peripheral type | 2-3                  | 2×2             |
| B05/B06        | 7              | Cancer/Para-cancer | 1(Death)     | 14                      | Male   | 71         | Lung adenocarcinoma | -               | 2-3                  | 9.5×6           |
| B07/B08        | 8              | Cancer/Para-cancer | 1(Death)     | 24                      | Male   | 72         | Lung adenocarcinoma | Central type    | 3                    | 6×6             |
| C01/C02        | 9              | Cancer/Para-cancer | 1(Death)     | 45                      | Female | 66         | Lung adenocarcinoma | Peripheral type | 1-2                  | 3×2             |
| C03/C04        | 10             | Cancer/Para-cancer | 1(Death)     | 70                      | Female | 66         | Lung adenocarcinoma | Peripheral type | 1-2                  | 3×2.5           |
| C05/C06        | 11             | Cancer/Para-cancer | 1(Death)     | 48                      | Male   | 49         | Lung adenocarcinoma | Central type    | 2                    | 2.8×2.5         |
| C07/C08        | 12             | Cancer/Para-cancer | 1(Death)     | 34                      | Female | 67         | Lung adenocarcinoma | -               | 2                    | 3×2             |

|         |    |                    |              |    |        |    |                     |                 |     |            |
|---------|----|--------------------|--------------|----|--------|----|---------------------|-----------------|-----|------------|
| D01/D02 | 13 | Cancer/Para-cancer | 1(Death)     | 14 | Male   | 67 | Lung adenocarcinoma | Peripheral type | 2   | 3×2.5      |
| D03/D04 | 14 | Cancer/Para-cancer | 1(Death)     | 22 | Female | 54 | Lung adenocarcinoma | Central type    | 2   | 4×3; 1×0.5 |
| C05/C06 | 15 | Cancer/Para-cancer | 1(Death)     | 60 | Female | 49 | Lung adenocarcinoma | Peripheral type | 2   | 2.5×2      |
| D07/D08 | 16 | Cancer/Para-cancer | 1(Death)     | 63 | Female | 64 | Lung adenocarcinoma | Peripheral type | 2   | 3×2        |
| E01/E02 | 17 | Cancer/Para-cancer | 1(Death)     | 25 | Male   | 61 | Lung adenocarcinoma | Central type    | 2-3 | 4.5×3      |
| E03/E04 | 18 | Cancer/Para-cancer | 1(Death)     | 36 | Female | 67 | Lung adenocarcinoma | Peripheral type | 2   | 1.5×1      |
| E05/E06 | 19 | Cancer/Para-cancer | 0 (Survival) | 84 | Male   | 37 | Lung adenocarcinoma | Central type    | 2   | 2.5×2.5×2  |
| E07/E08 | 20 | Cancer/Para-cancer | 1(Death)     | 36 | Male   | 44 | Lung adenocarcinoma | Peripheral type | 2   | 2×1.5      |
| F01/F02 | 21 | Cancer/Para-cancer | 0 (Survival) | 55 | Female | 56 | Lung adenocarcinoma | Peripheral type | 2   | 2×1.5      |
| F03/F04 | 22 | Cancer/Para-cancer | 1(Death)     | 36 | Female | 46 | Lung adenocarcinoma | Central type    | 3   | 4.5×3.5    |
| F05/F06 | 23 | Cancer/Para-cancer | 1(Death)     | 41 | Male   | 53 | Lung adenocarcinoma | Central type    | 2   | 3×2        |
| F07/F08 | 24 | Cancer/Para-cancer | 0 (Survival) | 83 | Male   | 47 | Lung adenocarcinoma | Central type    | 2   | 6×4        |
| G01/G02 | 25 | Cancer/Para-cancer | 1(Death)     | 25 | Female | 56 | Lung adenocarcinoma | Central type    | 2-3 | 3×2        |
| G03/G04 | 26 | Cancer/Para-cancer | 1(Death)     | 20 | Female | 49 | Lung adenocarcinoma | Peripheral type | 2   | 6×5        |

|         |    |                    |              |    |        |    |                     |                 |     |         |
|---------|----|--------------------|--------------|----|--------|----|---------------------|-----------------|-----|---------|
| G05/G06 | 27 | Cancer/Para-cancer | 1(Death)     | 25 | Male   | 55 | Lung adenocarcinoma | Peripheral type | 3   | 7×6×1.5 |
| G07/G08 | 28 | Cancer/Para-cancer | 1(Death)     | 30 | Male   | 48 | Lung adenocarcinoma | Peripheral type | 2-3 | 5×3     |
| H01/H02 | 29 | Cancer/Para-cancer | 1(Death)     | 35 | Male   | 67 | Lung adenocarcinoma | Central type    | 3   | 2.5×2   |
| H03/H04 | 30 | Cancer/Para-cancer | 1(Death)     | 21 | Female | 60 | Lung adenocarcinoma | Peripheral type | 1   | 2.5×2   |
| H05/H06 | 31 | Cancer/Para-cancer | 1(Death)     | 13 | Female | 68 | Lung adenocarcinoma | Peripheral type | 2   | 2.5×2.5 |
| H07/H08 | 32 | Cancer/Para-cancer | 0 (Survival) | 43 | Male   | 50 | Lung adenocarcinoma | Peripheral type | 2   | 2.3x2   |
| I01/I02 | 33 | Cancer/Para-cancer | 1(Death)     | 41 | Male   | 43 | Lung adenocarcinoma | Peripheral type | 2   | 5×3     |
| I03/I04 | 34 | Cancer/Para-cancer | 0 (Survival) | 79 | Female | 59 | Lung adenocarcinoma | Peripheral type | 2   | 2×2     |
| I05/I06 | 35 | Cancer/Para-cancer | 1(Death)     | 25 | Female | 40 | Lung adenocarcinoma | Peripheral type | 2   | 2.5×3   |
| I07/I08 | 36 | Cancer/Para-cancer | 1(Death)     | 28 | Female | 56 | Lung adenocarcinoma | Peripheral type | 2-3 | 3.5×2.5 |
| J01/J02 | 37 | Cancer/Para-cancer | 1(Death)     | 17 | Male   | 70 | Lung adenocarcinoma | Peripheral type | 3   | 6×4     |
| J03/J04 | 38 | Cancer/Para-cancer | 1(Death)     | 65 | Female | 57 | Lung adenocarcinoma | Peripheral type | 2   | 1.4×2.5 |
| J05/J06 | 39 | Cancer/Para-cancer | 1(Death)     | 22 | Female | 67 | Lung adenocarcinoma | Peripheral type | 2   | 6×4     |
| J07/J08 | 40 | Cancer/Para-cancer | 0 (Survival) | 79 | Male   | 50 | Lung adenocarcinoma | Peripheral type | 2   | 2.5×2   |

|         |    |                    |              |    |        |    |                     |                 |     |             |
|---------|----|--------------------|--------------|----|--------|----|---------------------|-----------------|-----|-------------|
| K01/K02 | 41 | Cancer/Para-cancer | 0 (Survival) | 43 | Male   | 67 | Lung adenocarcinoma | Peripheral type | 2   | 3.5×3       |
| K03/K04 | 42 | Cancer/Para-cancer | 1(Death)     | 27 | Male   | 71 | Lung adenocarcinoma | Central type    | 2   | 4×3×3       |
| K05/K06 | 43 | Cancer/Para-cancer | 1(Death)     | 18 | Male   | 58 | Lung adenocarcinoma | Peripheral type | 2-3 | 4.5×3.5×3   |
| K07/K08 | 44 | Cancer/Para-cancer | 1(Death)     | 33 | Female | 44 | Lung adenocarcinoma | Peripheral type | 2   | 2×1.5×1     |
| L01/L02 | 45 | Cancer/Para-cancer | 1(Death)     | 24 | Male   | 69 | Lung adenocarcinoma | Peripheral type | 2-3 | 2.5×2.4×2.5 |
| L03/L04 | 46 | Cancer/Para-cancer | 1(Death)     | 84 | Female | 62 | Lung adenocarcinoma | Peripheral type | 2   | 2.5         |
| L05/L06 | 47 | Cancer/Para-cancer | 0 (Survival) | 89 | Male   | 52 | Lung adenocarcinoma | Peripheral type | 2   | 2           |
| L07/L08 | 48 | Cancer/Para-cancer | 1(Death)     | 26 | Male   | 74 | Lung adenocarcinoma | -               | 2   | 17×12       |
| M01/M02 | 49 | Cancer/Para-cancer | 1(Death)     | 18 | Male   | 51 | Lung adenocarcinoma | -               | 3   | 3×2         |
| M03/M04 | 50 | Cancer/Para-cancer | 1(Death)     | 51 | Female | 51 | Lung adenocarcinoma | Peripheral type | 2   | 3×2         |
| M05/M06 | 51 | Cancer/Para-cancer | 1(Death)     | 17 | Female | 58 | Lung adenocarcinoma | -               | 2   | 4×3         |
| M07/M08 | 52 | Cancer/Para-cancer | 0 (Survival) | 84 | Female | 62 | Lung adenocarcinoma | -               | 1   | 3×2         |
| N01/N02 | 53 | Cancer/Para-cancer | 1(Death)     | 13 | Female | 64 | Lung adenocarcinoma | Peripheral type | 2   | 4.5×4       |
| N03/N04 | 54 | Cancer/Para-cancer | 0 (Survival) | 82 | Female | 53 | Lung adenocarcinoma | Peripheral type | 2   | 2×2         |

|         |    |                    |              |    |        |    |                     |                 |     |         |
|---------|----|--------------------|--------------|----|--------|----|---------------------|-----------------|-----|---------|
| N05/N06 | 55 | Cancer/Para-cancer | 1(Death)     | 50 | Male   | 60 | Lung adenocarcinoma | Peripheral type | 2   | 3×2     |
| N07/N08 | 56 | Cancer/Para-cancer | 0 (Survival) | 80 | Male   | 59 | Lung adenocarcinoma | Peripheral type | 2   | 3×2     |
| O01/O02 | 57 | Cancer/Para-cancer | 1(Death)     | 29 | Male   | 60 | Lung adenocarcinoma | Peripheral type | 2-3 | 4×3.5   |
| O03/O04 | 58 | Cancer/Para-cancer | 0 (Survival) | 77 | Female | 50 | Lung adenocarcinoma | Peripheral type | 2   | 3×3     |
| O05/O06 | 59 | Cancer/Para-cancer | 1(Death)     | 49 | Female | 69 | Lung adenocarcinoma | Peripheral type | 2   | 2.5×2.5 |
| O07/O08 | 60 | Cancer/Para-cancer | 1(Death)     | 52 | Female | 60 | Lung adenocarcinoma | Peripheral type | 3   | 1.5×3   |

Table S2. Clinical information of patients with esophageal squamous cell carcinoma administrated with neoadjuvant radiotherapy.

| Patient number | Sex    | Age (year) | Status      | Survival period (month) | Preoperative pathology             | Treatment method                                                       |
|----------------|--------|------------|-------------|-------------------------|------------------------------------|------------------------------------------------------------------------|
| 1              | Male   | 59         | 0(Survival) | 65                      | Esophageal Squamous Cell Carcinoma | Neoadjuvant radiotherapy + radical esophagectomy for esophageal cancer |
| 2              | Male   | 70         | 0(Survival) | 63                      | Esophageal Squamous Cell Carcinoma | Neoadjuvant radiotherapy + radical esophagectomy for esophageal cancer |
| 3              | Male   | 48         | 0(Survival) | 61                      | Esophageal Squamous Cell Carcinoma | Neoadjuvant radiotherapy + radical esophagectomy for esophageal cancer |
| 4              | Female | 72         | 0(Survival) | 60                      | Esophageal Squamous Cell Carcinoma | Neoadjuvant radiotherapy + radical esophagectomy for esophageal cancer |
| 5              | Male   | 54         | 0(Survival) | 60                      | Esophageal Squamous Cell Carcinoma | Neoadjuvant radiotherapy + radical esophagectomy for esophageal cancer |
| 6              | Male   | 56         | 0(Survival) | 60                      | Esophageal Squamous Cell Carcinoma | Neoadjuvant radiotherapy + radical esophagectomy for esophageal cancer |
| 7              | Male   | 60         | 0(Survival) | 59                      | Esophageal Squamous Cell Carcinoma | Neoadjuvant radiotherapy + radical esophagectomy for esophageal cancer |
| 8              | Female | 68         | 0(Survival) | 58                      | Esophageal Squamous Cell Carcinoma | Neoadjuvant radiotherapy + radical esophagectomy for esophageal cancer |
| 9              | Female | 58         | 0(Survival) | 55                      | Esophageal Squamous Cell Carcinoma | Neoadjuvant radiotherapy + radical esophagectomy for esophageal cancer |
| 10             | Male   | 55         | 1(Death)    | 20                      | Esophageal Squamous Cell Carcinoma | Neoadjuvant radiotherapy + radical esophagectomy for esophageal cancer |
| 11             | Male   | 71         | 0(Survival) | 54                      | Esophageal Squamous Cell Carcinoma | Neoadjuvant radiotherapy + radical esophagectomy for esophageal cancer |
| 12             | Male   | 61         | 1(Death)    | 41                      | Esophageal Squamous Cell Carcinoma | Neoadjuvant radiotherapy + radical esophagectomy for esophageal cancer |
| 13             | Male   | 67         | 1(Death)    | 15                      | Esophageal Squamous Cell Carcinoma | Neoadjuvant radiotherapy + radical esophagectomy for esophageal cancer |

|    |        |    |             |    |                                    |                                                                        |
|----|--------|----|-------------|----|------------------------------------|------------------------------------------------------------------------|
| 14 | Male   | 61 | 0(Survival) | 52 | Esophageal Squamous Cell Carcinoma | Neoadjuvant radiotherapy + radical esophagectomy for esophageal cancer |
| 15 | Male   | 55 | 0(Survival) | 51 | Esophageal Squamous Cell Carcinoma | Neoadjuvant radiotherapy + radical esophagectomy for esophageal cancer |
| 16 | Male   | 76 | 0(Survival) | 51 | Esophageal Squamous Cell Carcinoma | Neoadjuvant radiotherapy + radical esophagectomy for esophageal cancer |
| 17 | Male   | 59 | 0(Survival) | 50 | Esophageal Squamous Cell Carcinoma | Neoadjuvant radiotherapy + radical esophagectomy for esophageal cancer |
| 18 | Female | 67 | 1(Death)    | 10 | Esophageal Squamous Cell Carcinoma | Neoadjuvant radiotherapy + radical esophagectomy for esophageal cancer |
| 19 | Male   | 58 | 1(Death)    | 22 | Esophageal Squamous Cell Carcinoma | Neoadjuvant radiotherapy + radical esophagectomy for esophageal cancer |
| 20 | Male   | 65 | 1(Death)    | 25 | Esophageal Squamous Cell Carcinoma | Neoadjuvant radiotherapy + radical esophagectomy for esophageal cancer |
| 21 | Male   | 66 | 0(Survival) | 48 | Esophageal Squamous Cell Carcinoma | Neoadjuvant radiotherapy + radical esophagectomy for esophageal cancer |
| 22 | Female | 54 | 1(Death)    | 10 | Esophageal Squamous Cell Carcinoma | Neoadjuvant radiotherapy + radical esophagectomy for esophageal cancer |
| 23 | Male   | 68 | 0(Survival) | 48 | Esophageal Squamous Cell Carcinoma | Neoadjuvant radiotherapy + radical esophagectomy for esophageal cancer |
| 24 | Male   | 56 | 0(Survival) | 48 | Esophageal Squamous Cell Carcinoma | Neoadjuvant radiotherapy + radical esophagectomy for esophageal cancer |
| 25 | Male   | 69 | 0(Survival) | 47 | Esophageal Squamous Cell Carcinoma | Neoadjuvant radiotherapy + radical esophagectomy for esophageal cancer |
| 26 | Male   | 72 | 0(Survival) | 47 | Esophageal Squamous Cell Carcinoma | Neoadjuvant radiotherapy + radical esophagectomy for esophageal cancer |
| 27 | Male   | 63 | 0(Survival) | 47 | Esophageal Squamous Cell Carcinoma | Neoadjuvant radiotherapy + radical esophagectomy for esophageal cancer |
| 28 | Female | 70 | 0(Survival) | 45 | Esophageal Squamous Cell Carcinoma | Neoadjuvant radiotherapy + radical esophagectomy for esophageal cancer |

|    |      |    |             |    |                                    |                                                                        |
|----|------|----|-------------|----|------------------------------------|------------------------------------------------------------------------|
| 29 | Male | 57 | 0(Survival) | 45 | Esophageal Squamous Cell Carcinoma | Neoadjuvant radiotherapy + radical esophagectomy for esophageal cancer |
|----|------|----|-------------|----|------------------------------------|------------------------------------------------------------------------|

---
